# Supplementary material for: Unsuppressed lipolysis in adipocytes is linked with enhanced gluconeogenesis and altered bile acid physiology in InsrP1195L/+ mice fed high-fat-diet
Source: PubMed Central journal article supplement (PMC4663474; doi:10.1038/srep17565), 2015-11-30
Supplement: srep17565-s1.pdf [file srep17565-s1.pdf]

Unsuppressed lipolysis in adipocytes is linked with enhanced gluconeogenesis and altered bile acid physiology in *Insr*<sup>P1195L/+</sup> mice fed high-fat-diet

Eun Young Lee,<sup>1¶</sup> Kenichi Sakurai,<sup>2¶</sup> Xilin Zhang,<sup>1</sup> Chitoku Toda,<sup>3</sup> Tomoaki Tanaka,<sup>2</sup> Meizi Jiang,<sup>4</sup> Takuji Shirasawa,<sup>5</sup> Kaori Tachibana,<sup>2</sup> Koutaro Yokote,<sup>2</sup> Antonio Vidal-Puig,<sup>6</sup> Yasuhiko Minokoshi,<sup>3</sup> Takashi Miki<sup>1\*</sup>

1 Department of Medical Physiology, 2 Department of Clinical Cell Biology and Medicine, 4 Department of Genome Research and Clinical Application, Chiba University, Graduate School of Medicine, Chiba 260-8670 Japan

3 Department of Developmental Physiology, National Institute for Physiological Sciences, Okazaki 444-8585, Japan

5 Department of Ageing Control, Juntendo University, Graduate School of Medicine. Bunkyo 113-0033, Japan

6 Department of Clinical Biochemistry, Metabolic Research Laboratories, Addenbrooke's Treatment Centre, Institute of Metabolic Science, University of Cambridge, Cambridge CB2 0QQ, UK

<sup>¶</sup>Equal contributors

\*Correspondence: [tmiki@faculty.chiba-u.jp](mailto:tmiki@faculty.chiba-u.jp)

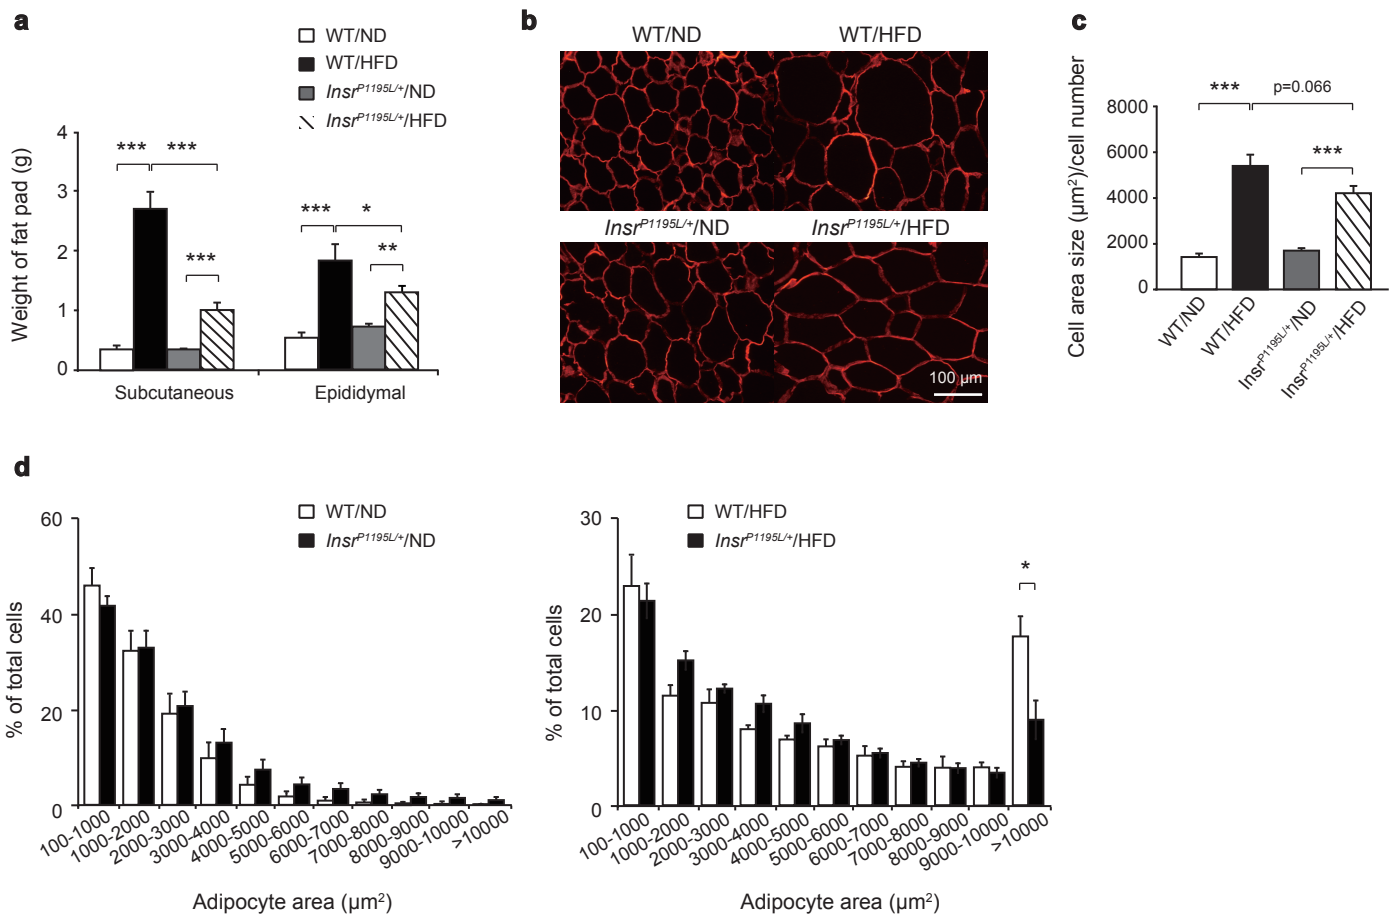

### Supplementary Figure S1

Fat weight and adipocyte size. a. Fat weight of the mice at 25 weeks of age ( $n = 3-8$ ). Epididyma fat weight in *Insr*<sup>P1195L/+</sup>/HFD mice was significantly decreased compared with that of WT/HFD mice. b. Immunostaining of epididymal fat tissue with Caveolin-1 (1:1000, BD biosciences). c. Mean adipocyte size. d. Histogram of the cell area of WT/ND and *Insr*<sup>P1195L/+</sup>/ND mice (left) and that of WT/HFD and *Insr*<sup>P1195L/+</sup>/HFD mice (right). The adipocyte size was not different between of WT/ND and *Insr*<sup>P1195L/+</sup>/ND mice (left). By contrast, the number of large (>10000 μm<sup>2</sup>) adipocytes of *Insr*<sup>P1195L/+</sup>/HFD mice was significantly decreased compared with that of WT/HFD mice (right). Data are mean ± SEM. One-way ANOVA plus Bonferroni *post-hoc* analysis. \* $P < 0.05$ , \*\*  $P < 0.01$ , \*\*\*  $P < 0.001$ .

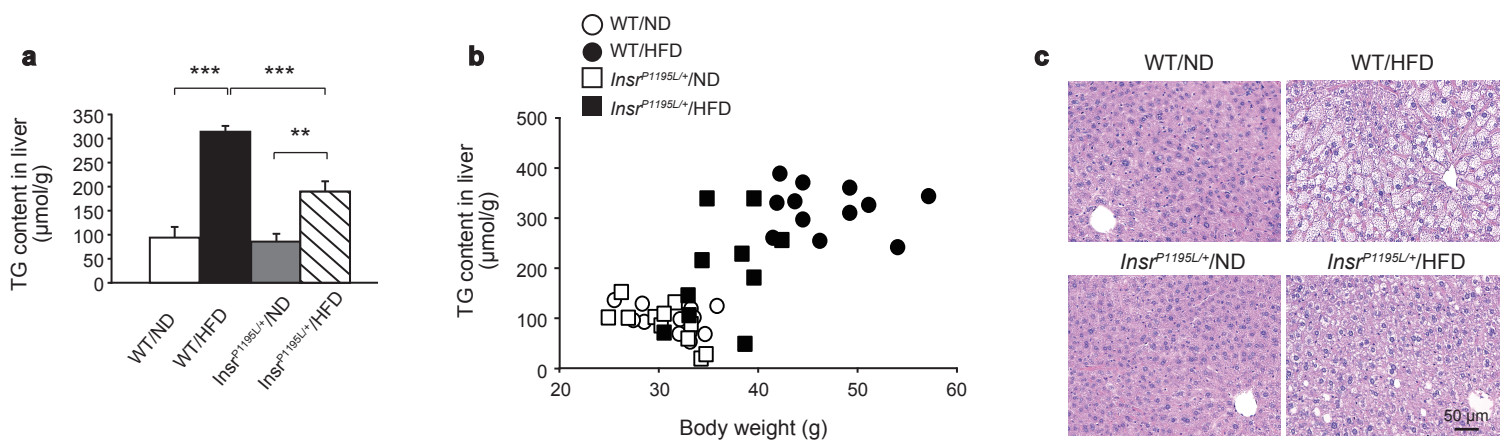

### Supplementary Figure S2

Fat accumulation in the liver is reduced in *Insr*<sup>P1195L/+</sup>/HFD mice. (a) TG content in *Insr*<sup>P1195L/+</sup>/HFD liver was significantly less than that in WT/HFD liver ( $n = 10-12$  per each group). (b) Relationship between body weight and TG content in liver. (c) HE staining of *Insr*<sup>P1195L/+</sup>/HFD liver shows the amount of lipid droplet is decreased compared with that of WT/HFD liver. Data are mean  $\pm$  SEM. Two-way ANOVA plus Bonferroni *post-hoc* analysis. \*\*  $P < 0.01$ , \*\*\*  $P < 0.001$ .

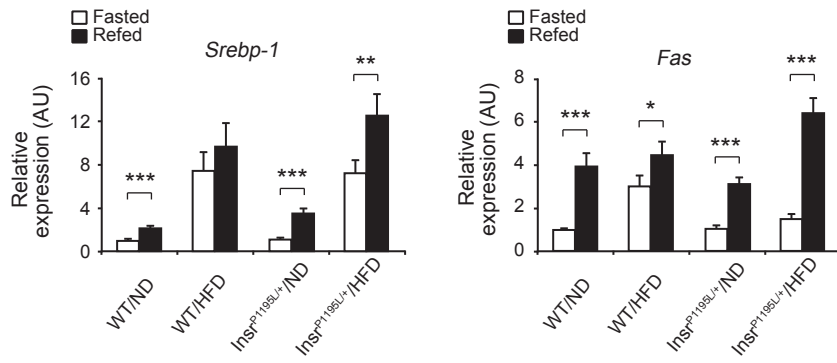

### Supplementary Figure S3

mRNA expressions of genes regulated by insulin are not decreased in liver of *Insr*<sup>P1195L/+</sup>/HFD mice. mRNA expressions of *Srebp-1* in *Insr*<sup>P1195L/+</sup>/ND liver is not different from that in WT/ND liver, including its feeding-induced increase. In addition, mRNA expression of *Fas*, a target of *Srebp-1*, is not decreased in *Insr*<sup>P1195L/+</sup>/HFD liver, indicating that induction of *Srebp-1* and *Fas* by refeeding or HFD remains 'sensitive' under insulin resistance in *Insr*<sup>P1195L/+</sup> mice ( $n = 10-12$  per each group). Data are mean  $\pm$  SEM. Significance was analyzed by two-tailed Student's  $t$ -test between fasted and refeed conditions. \* $P < 0.05$ , \*\* $P < 0.01$ , \*\*\* $P < 0.001$ .

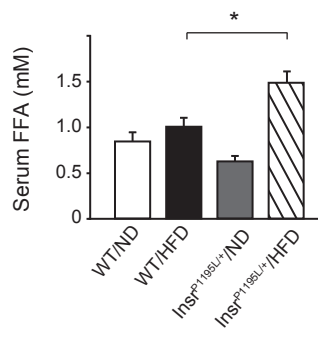

#### Supplementary Figure S4

Serum FFA levels. Serum FFA levels were measured by using the kit from BioVision, Inc. (San Francisco, CA, USA) ( $n = 8-13$  per each group). Data are mean  $\pm$  SEM. One-way ANOVA plus Bonferroni *post-hoc* analysis. \* $P < 0.05$ .

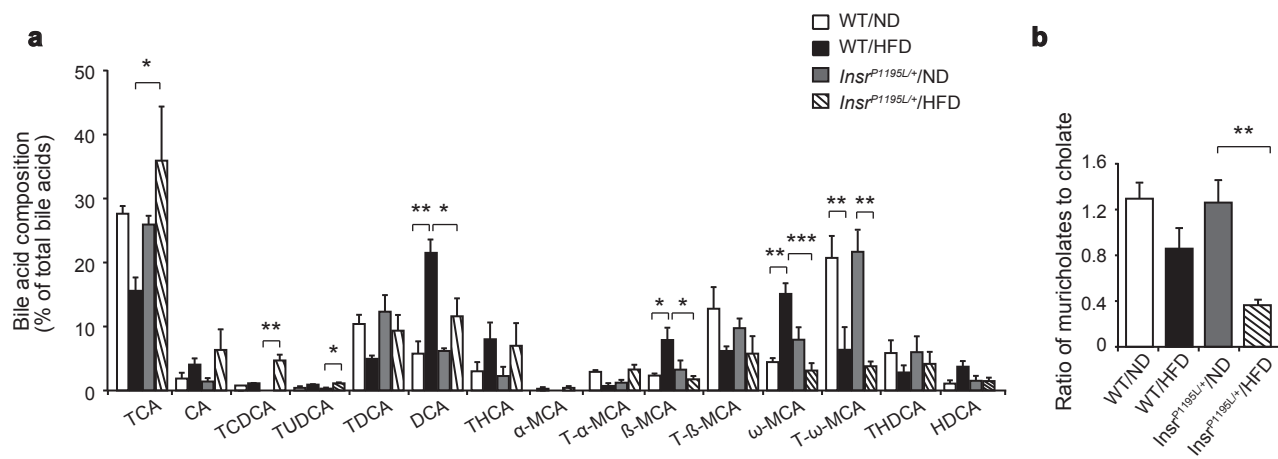

### Supplementary Figure S5

Serum bile acid composition. Measurement of BAs in serum revealed that BA composition was altered in *Insr<sup>P1195L/+</sup>/HFD* mice (n=4 per each group). Data are mean ± SEM. One-way ANOVA plus Bonferroni *post-hoc* analysis. \* $P < 0.05$ , \*\*  $P < 0.01$ , \*\*\*  $P < 0.001$ .

Figure 2h

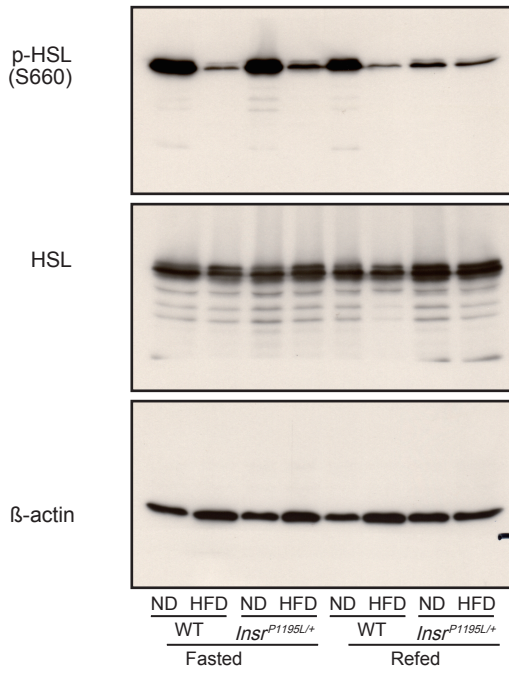

Figure 2i

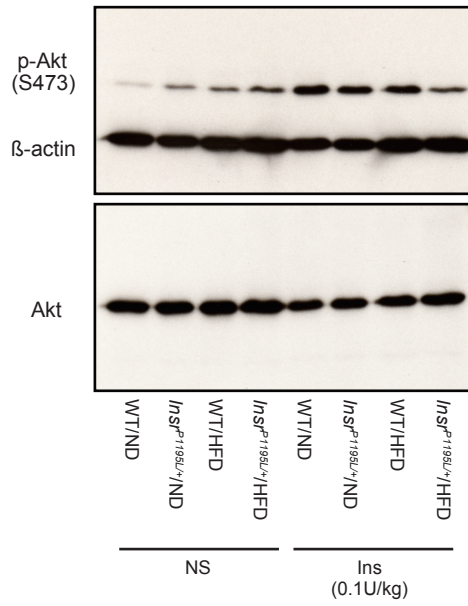

Figure 2j

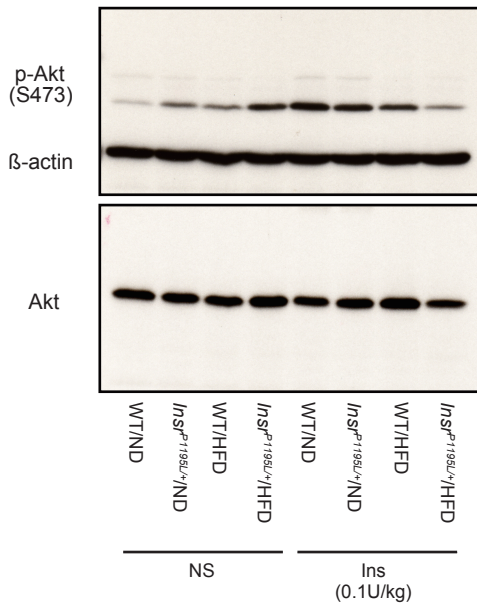

Figure 5d

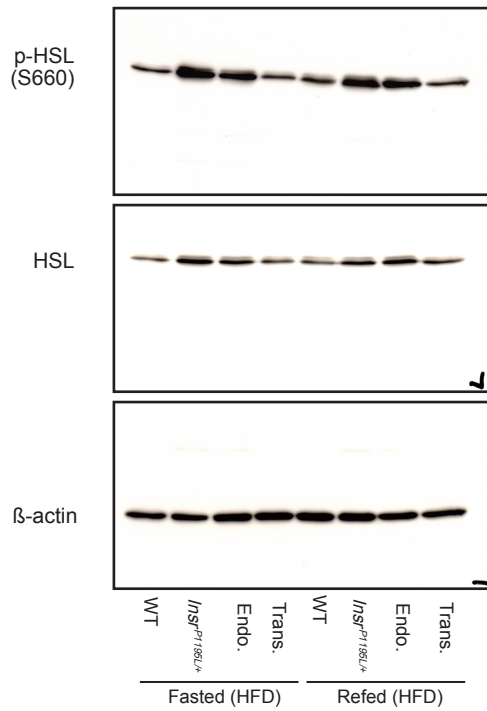

Full-length blots of Figure 2h, 2i, 2j, 5d.

Supplementary Figure S6
